# Supplementary material
Source: MDPI journal article supplement (https://www.mdpi.com/2073-4441/15/19/3505)
Supplement: s1 [file s1]

## Supplementary Material

**Table S1:** Data from rainwater and stormwater monitoring.

| Date of sampling | Sample location | Time interval since runoff beginning | pH   | SpCond (µS/cm) | TDS (mg/L) | Turbidity (NTU) | fDOM (QSU) | Cu (µg/L) | Cr (µg/L) | Fe (µg/L) | Ni (µg/L) | Zn (µg/L) | Pb (µg/L) |
|------------------|-----------------|--------------------------------------|------|----------------|------------|-----------------|------------|-----------|-----------|-----------|-----------|-----------|-----------|
| 12th March 2021  | RR              | 0-10                                 | 5.76 | 53.40          | 35.00      | 2.23            | 31.15      | 15.05     | 4.32      | 255.84    | 3.14      | 2,997.52  | 10.83     |
| 12th March 2021  | RR              | `10-20                               | 5.97 | 19.79          | 13.00      | 5.32            | 31.87      | 93.33     | 7.32      | 801.92    | 5.28      | 2,360.71  | 13.74     |
| 12th March 2021  | RR              | 20-30                                | 5.88 | 20.91          | 14.00      | 4.84            | 34.11      | 96.68     | 6.34      | 218.50    | 6.81      | 1,985.82  | 8.81      |
| 12th March 2021  | RR              | 30-40                                | 6.54 | 20.74          | 13.00      | 3.63            | 22.25      | 73.98     | 6.34      | 179.05    | 7.42      | 1,926.84  | 11.70     |
| 12th March 2021  | SR              | 40-50                                | 6.20 | 347.35         | 226.10     | 86.53           | 136.80     | 34.36     | 14.76     | 998.00    | 5.01      | 101.98    | 9.78      |
| 12th March 2021  | SC              | 50-60                                | 7.85 | 2,562.63       | 1,808.78   | 105.63          | 125.23     | 109.20    | 47.60     | 18,200.00 | 31.02     | 705.61    | 47.00     |
| 12th March 2021  | RU              | 60-70                                | 7.86 | 345.00         | 224.00     | 3.58            | 59.50      | 8.25      | 11.26     | 721.77    | 2.29      | 5.21      | 18.00     |
| 12th March 2021  | RD              | 70-80                                | 7.52 | 345.00         | 224.00     | 6.32            | 59.99      | 9.98      | 10.82     | 988.00    | 4.26      | 15.26     | 18.30     |
| 12th March 2021  | DR              | bulk sample                          | 5.21 | 15.20          | 21.76      | 4.30            | 16.25      | 0.25      | 12.01     | 33.26     | 3.25      | 98.90     | 3.22      |
| 16th May 2021    | RR              | 0-10                                 | 6.70 | 549.68         | 357.00     | 87.67           | 168.24     | 165.34    | 13.80     | 896.68    | 15.17     | 8,509.70  | 35.15     |
| 16th May 2021    | RR              | `10-20                               | 6.77 | 97.80          | 64.00      | 45.75           | 82.89      | 85.60     | 9.23      | 591.62    | 7.58      | 1,680.60  | 31.87     |
| 16th May 2021    | RR              | 20-30                                | 6.28 | 59.79          | 39.00      | 16.47           | 66.59      | 149.76    | 8.87      | 292.58    | 7.18      | 1,146.78  | 14.31     |
| 16th May 2021    | RR              | 30-40                                | 7.22 | 52.10          | 34.00      | 3.37            | 78.70      | 132.68    | 8.04      | 110.13    | 5.86      | 1,183.76  | 15.88     |
| 16th May 2021    | SR              | 40-50                                | 6.63 | 125.00         | 161.00     | 83.95           | 286.92     | 55.02     | 25.08     | 750.30    | 18.02     | 145.90    | 64.64     |
| 16th May 2021    | SC              | 50-60                                | 7.85 | 156.25         | 201.25     | 104.94          | 200.99     | 106.80    | 31.35     | 12,550.20 | 22.53     | 182.38    | 80.80     |
| 16th May 2021    | RU              | 60-70                                | 7.99 | 332.00         | 223.43     | 5.20            | 60.69      | 5.23      | 11.49     | 736.21    | 2.34      | 8.21      | 12.60     |
| 16th May 2021    | RD              | 70-80                                | 7.98 | 332.00         | 223.00     | 10.20           | 103.55     | 7.96      | 11.04     | 733.01    | 4.35      | 15.20     | 12.30     |
| 16th May 2021    | DR              | bulk sample                          | 5.41 | 12.02          | 20.99      | 2.25            | 16.01      | 2.23      | 3.25      | 21.01     | 3.41      | 175.02    | 7.00      |
| 22nd June 2021   | RR              | 0-10                                 | 5.87 | 339.70         | 221.00     | 20.73           | 441.68     | 24.81     | 4.74      | 503.59    | 11.10     | 1,8611.0  | 17.78     |
| 22nd June 2021   | RR              | `10-20                               | 5.76 | 61.58          | 40.00      | 5.21            | 182.92     | 2.37      | 1.95      | 99.34     | 3.64      | 2132.86   | 8.97      |
| 22nd June 2021   | RR              | 20-30                                | 6.05 | 113.10         | 73.00      | 8.57            | 369.17     | 7.33      | 3.99      | 161.07    | 5.04      | 5026.90   | 28.91     |

|                 |    |             |      |        |        |        |        |        |        |          |       |          |       |
|-----------------|----|-------------|------|--------|--------|--------|--------|--------|--------|----------|-------|----------|-------|
| 22nd June 2021  | RR | 30-40       | 5.71 | 105.94 | 69.00  | 8.51   | 420.86 | 79.93  | 3.57   | 131.31   | 17.70 | 4,853.15 | 21.19 |
| 22nd June 2021  | SR | 40-50       | 7.80 | 101.00 | 92.40  | 45.59  | 158.32 | 9.85   | 4.96   | 736.25   | 12.21 | 31.28    | 24.24 |
| 22nd June 2021  | SC | 50-60       | 8.58 | 248.16 | 161.04 | 112.53 | 98.50  | 43.13  | 20.73  | 2,309.11 | 36.50 | 324.65   | 3.05  |
| 22nd June 2021  | RU | 60-70       | 7.25 | 345.00 | 283.80 | 2.18   | 70.53  | 1.70   | 0.00   | 632.12   | 1.11  | 5.25     | 4.69  |
| 22nd June 2021  | RD | 70-80       | 7.35 | 349.00 | 285.12 | 6.73   | 70.73  | 6.88   | 1.69   | 1,122.00 | 1.55  | 16.36    | 3.99  |
| 22nd June 2021  | DR | bulk sample | 5.12 | 26.06  | 17.00  | 1.80   | 12.91  | 0.10   | 0.87   | 25.99    | 1.75  | 110.20   | 0.65  |
| 24th June 2021  | RR | 0-10        | 6.71 | 99.19  | 64.00  | 10.32  | 61.07  | 2.25   | 0.19   | 359.25   | 2.24  | 5,088.94 | 3.73  |
| 24th June 2021  | RR | `10-20      | 6.06 | 58.16  | 38.00  | 8.31   | 52.66  | 0.76   | 0.13   | 187.43   | 1.83  | 2,806.51 | 4.05  |
| 24th June 2021  | RR | 20-30       | 5.62 | 36.41  | 24.00  | 3.74   | 34.06  | 0.10   | 0.00   | 98.31    | 0.95  | 1,492.81 | 3.78  |
| 24th June 2021  | RR | 30-40       | 5.48 | 24.91  | 16.00  | 2.57   | 25.51  | 0.10   | 0.00   | 45.29    | 1.24  | 1,029.81 | 3.39  |
| 24th June 2021  | SR | 40-50       | 6.69 | 98.36  | 70.00  | 34.54  | 119.94 | 15.30  | 4.49   | 755.36   | 4.15  | 45.00    | 13.39 |
| 24th June 2021  | SC | 50-60       | 8.18 | 188.00 | 122.00 | 85.25  | 89.12  | 32.68  | 15.71  | 1,749.32 | 25.10 | 245.95   | 2.31  |
| 24th June 2021  | RU | 60-70       | 7.68 | 355.00 | 215.00 | 1.65   | 53.43  | 1.29   | 0.00   | 478.88   | 0.84  | 7.25     | 8.99  |
| 24th June 2021  | RD | 70-80       | 7.69 | 355.00 | 216.00 | 5.10   | 53.58  | 5.21   | 1.28   | 850.00   | 1.17  | 6.98     | 3.88  |
| 24th June 2021  | DR | bulk sample | 5.45 | 18.00  | 12.00  | 1.25   | 10.22  | 1.63   | 1.50   | 301.41   | 3.04  | 183.57   | 4.46  |
| 2nd July 2021   | RR | 0-10        | 6.07 | 14.29  | 9.00   | 0.95   | 4.87   | 0.00   | 1.00   | 1.00     | 1.50  | 493.00   | 4.50  |
| 2nd July 2021   | RR | `10-20      | 5.82 | 8.39   | 5.00   | 19.76  | 3.20   | 3.50   | 1.00   | 0.10     | 1.50  | 444.50   | 3.20  |
| 2nd July 2021   | RR | 20-30       | 5.45 | 6.76   | 4.00   | 0.57   | 2.76   | 57.00  | 1.00   | 12.50    | 0.00  | 477.00   | 2.50  |
| 2nd July 2021   | RR | 30-40       | 5.26 | 8.11   | 5.00   | 1.05   | 2.97   | 0.10   | 1.00   | 0.10     | 0.50  | 442.00   | 2.50  |
| 2nd July 2021   | SR | 40-50       | 6.70 | 70.40  | 46.00  | 7.41   | 39.27  | 8.50   | 3.00   | 295.00   | 8.50  | 43.50    | 5.00  |
| 2nd July 2021   | SC | 50-60       | 7.85 | 65.10  | 42.00  | 13.64  | 18.41  | 103.42 | 129.52 | 931.50   | 93.80 | 217.03   | 90.00 |
| 2nd July 2021   | RU | 60-70       | 7.03 | 325.00 | 226.00 | 16.67  | 33.92  | 2.25   | 5.50   | 1,387.50 | 1.50  | 4.69     | 2.00  |
| 2nd July 2021   | RD | 70-80       | 6.96 | 324.00 | 228.00 | 18.94  | 33.07  | 2.01   | 3.77   | 1,397.55 | 0.72  | 9.69     | 2.21  |
| 2nd July 2021   | DR | bulk sample | 5.64 | 55.34  | 36.00  | 30.51  | 71.67  | 7.00   | 1.00   | 80.00    | 0.50  | 134.00   | 12.50 |
| 6th August 2021 | RR | 0-10        | 6.94 | 30.80  | 20.00  | 1.54   | 22.38  | 0.00   | 1.00   | 404.50   | 0.00  | 1,029.00 | 0.00  |
| 6th August 2021 | RR | `10-20      | 6.85 | 19.30  | 13.00  | 2.33   | 20.39  | 0.00   | 1.00   | 312.00   | 0.00  | 855.50   | 0.00  |
| 6th August 2021 | RR | 20-30       | 5.98 | 17.50  | 11.00  | 12.15  | 16.82  | 0.00   | 1.00   | 239.50   | 0.00  | 762.00   | 0.00  |
| 6th August 2021 | RR | 30-40       | 6.26 | 12.30  | 8.00   | 1.18   | 16.25  | 0.00   | 1.50   | 119.50   | 0.00  | 635.00   | 0.00  |
| 6th August 2021 | SR | 40-50       | 6.62 | 120.10 | 99.00  | 9.40   | 171.07 | 12.05  | 3.00   | 908.00   | 13.00 | 12.05    | 10.35 |
| 6th August 2021 | SC | 50-60       | 7.52 | 336.40 | 219.00 | 39.90  | 97.54  | 26.50  | 13.00  | 1398.00  | 39.80 | 556.00   | 2.50  |

|                     |    |             |      |          |          |        |        |        |        |           |        |          |        |
|---------------------|----|-------------|------|----------|----------|--------|--------|--------|--------|-----------|--------|----------|--------|
| 6th August 2021     | RU | 60-70       | 6.70 | 320.00   | 217.00   | 2.14   | 38.22  | 1.02   | 1.50   | 471.00    | 1.50   | 4.58     | 1.25   |
| 6th August 2021     | RD | 70-80       | 6.75 | 325.00   | 222.00   | 5.86   | 35.88  | 2.23   | 8.75   | 779.22    | 5.16   | 5.25     | 2.60   |
| 6th August 2021     | DR | bulk sample | 5.13 | 11.70    | 8.00     | 2.44   | 0.05   | 1.68   | 6.46   | 62.85     | 3.40   | 106.63   | 3.28   |
| 30th September 2021 | RR | 0-10        | 7.18 | 28.23    | 24.00    | 5.77   | 50.60  | 8.90   | 6.95   | 236.87    | 2.18   | 2,473.20 | 10.26  |
| 30th September 2021 | RR | `10-20      | 7.06 | 14.05    | 11.94    | 3.12   | 35.98  | 8.19   | 8.78   | 172.99    | 10.71  | 1,185.52 | 8.95   |
| 30th September 2021 | RR | 20-30       | 6.92 | 13.02    | 11.07    | 1.86   | 35.91  | 8.46   | 7.89   | 151.77    | 5.39   | 1,214.82 | 8.15   |
| 30th September 2021 | RR | 30-40       | 6.78 | 9.85     | 8.37     | 1.48   | 32.80  | 6.76   | 5.99   | 141.36    | 3.05   | 1,328.57 | 1.05   |
| 30th September 2021 | SR | 40-50       | 6.90 | 68.00    | 44.00    | 32.29  | 118.88 | 24.60  | 10.02  | 1,577.72  | 5.25   | 94.30    | 10.37  |
| 30th September 2021 | SC | 50-60       | 7.10 | 899.08   | 720.00   | 26.91  | 52.00  | 47.50  | 88.64  | 2,839.62  | 12.24  | 810.75   | 10.03  |
| 30th September 2021 | RU | 60-70       | 7.77 | 340.00   | 228.00   | 1.85   | 28.10  | 4.95   | 6.85   | 431.36    | 5.37   | 10.25    | 3.28   |
| 30th September 2021 | RD | 70-80       | 7.75 | 341.00   | 252.00   | 3.41   | 29.60  | 7.90   | 7.08   | 852.00    | 9.42   | 15.36    | 4.96   |
| 30th September 2021 | DR | bulk sample | 6.08 | 39.20    | 21.00    | 4.21   | 1.20   | 1.39   | 8.63   | 213.08    | 9.72   | 4.90     | 15.46  |
| 31th December 2021  | RR | 0-10        | 6.16 | 53.73    | 35.00    | 5.66   | 33.80  | 7.83   | 5.50   | 126.95    | 3.81   | 1,550.95 | 3.33   |
| 31th December 2021  | RR | `10-20      | 5.48 | 41.88    | 27.00    | 6.09   | 31.43  | 5.62   | 5.34   | 105.74    | 3.78   | 1,535.24 | 7.74   |
| 31th December 2021  | RR | 20-30       | 5.57 | 22.20    | 14.00    | 5.44   | 27.51  | 8.32   | 5.62   | 77.76     | 4.47   | 1,633.76 | 4.72   |
| 31th December 2021  | RR | 30-40       | 5.85 | 33.94    | 22.00    | 4.07   | 29.34  | 7.28   | 5.98   | 80.48     | 3.59   | 1,490.68 | 7.28   |
| 31th December 2021  | SR | 40-50       | 7.58 | 1,220.99 | 1,119.00 | 336.85 | 16.05  | 173.09 | 114.71 | 51,251.23 | 52.02  | 1,752.02 | 120.77 |
| 31th December 2021  | SC | 50-60       | 7.84 | 5,607.87 | 3645.00  | 123.92 | 48.05  | 351.27 | 231.38 | 72,268.60 | 107.11 | 4,662.02 | 117.58 |
| 31th December 2021  | RU | 60-70       | 7.23 | 424.40   | 276.00   | 4.48   | 28.60  | 3.06   | 5.96   | 780.89    | 2.77   | 8.50     | 2.85   |
| 31th December 2021  | RD | 70-80       | 7.22 | 586.87   | 381.44   | 12.25  | 29.60  | 8.69   | 8.69   | 1,859.09  | 4.71   | 13.36    | 2.39   |
| 31th December 2021  | DR | bulk sample | 5.52 | 12.20    | 8.01     | 3.55   | 2.25   | 14.08  | 6.34   | 153.26    | 5.08   | 134.00   | 8.74   |
| 9th February 2022   | RR | 0-10        | 7.48 | 57.81    | 38.00    | 4.32   | 19.13  | 5.24   | 4.68   | 78.00     | 2.98   | 1,472.05 | 3.14   |
| 9th February 2022   | RR | `10-20      | 6.95 | 43.34    | 28.00    | 0.99   | 17.82  | 5.02   | 12.26  | 68.37     | 8.13   | 1,164.18 | 4.30   |
| 9th February 2022   | RR | 20-30       | 6.72 | 40.74    | 26.22    | 0.92   | 17.53  | 4.89   | 4.52   | 58.18     | 3.56   | 1,136.73 | 4.11   |
| 9th February 2022   | RR | 30-40       | 5.45 | 39.19    | 25.22    | 1.21   | 17.30  | 4.97   | 4.69   | 52.45     | 3.56   | 1,055.29 | 4.00   |
| 9th February 2022   | SR | 40-50       | 6.80 | 231.69   | 151.00   | 211.09 | 21.50  | 41.02  | 21.16  | 6,601.01  | 14.79  | 289.80   | 20.21  |
| 9th February 2022   | SC | 50-60       | 7.32 | 1,677.91 | 1,266.00 | 221.14 | 19.92  | 99.10  | 85.20  | 13,177.79 | 39.80  | 812.83   | 14.32  |
| 9th February 2022   | RU | 60-70       | 7.96 | 358.00   | 254.00   | 7.38   | 74.07  | 4.48   | 5.62   | 672.07    | 3.17   | 2.25     | 5.68   |
| 9th February 2022   | RD | 70-80       | 7.43 | 450.00   | 250.00   | 13.87  | 63.64  | 17.80  | 9.75   | 1,073.43  | 7.80   | 5.99     | 5.10   |
| 9th February 2022   | DR | bulk sample | 5.35 | 48.67    | 31.78    | 2.06   | 6.77   | 16.36  | 9.14   | 129.93    | 10.02  | 140.30   | 8.10   |

|                    |    |             |      |          |          |        |        |       |       |           |       |          |       |
|--------------------|----|-------------|------|----------|----------|--------|--------|-------|-------|-----------|-------|----------|-------|
| 4th April 2022     | RR | 0-10        | 6.45 | 387.34   | 252.00   | 18.95  | 184.98 | 48.37 | 10.44 | 957.49    | 15.49 | 7,279.68 | 17.59 |
| 4th April 2022     | RR | `10-20      | 6.15 | 304.14   | 198.00   | 23.37  | 197.93 | 34.65 | 10.56 | 716.51    | 11.57 | 5,069.33 | 8.80  |
| 4th April 2022     | RR | 20-30       | 6.42 | 273.29   | 178.00   | 20.47  | 187.82 | 34.00 | 11.30 | 764.15    | 16.08 | 4,699.58 | 10.30 |
| 4th April 2022     | RR | 30-40       | 5.16 | 228.29   | 148.00   | 230.40 | 130.78 | 30.90 | 9.84  | 508.68    | 13.23 | 4,553.19 | 20.22 |
| 4th April 2022     | SR | 40-50       | 6.50 | 364.10   | 237.00   | 90.70  | 241.68 | 36.02 | 15.48 | 1,698.00  | 5.25  | 104.06   | 10.25 |
| 4th April 2022     | SC | 50-60       | 7.58 | 2,686.20 | 1,896.00 | 40.66  | 67.03  | 79.90 | 49.90 | 12,978.78 | 19.67 | 739.63   | 22.16 |
| 4th April 2022     | RU | 60-70       | 7.46 | 340.00   | 240.00   | 3.71   | 33.77  | 5.26  | 4.86  | 308.71    | 3.13  | 28.00    | 5.27  |
| 4th April 2022     | RD | 70-80       | 7.06 | 341.00   | 241.00   | 5.02   | 30.20  | 5.26  | 5.38  | 450.00    | 5.35  | 28.00    | 3.47  |
| 4th April 2022     | DR | bulk sample | 5.97 | 21.00    | 10.00    | 11.24  | 4.60   | 9.90  | 6.18  | 356.84    | 9.86  | 105.00   | 6.14  |
| 9th June 2022      | RR | 0-10        | 6.45 | 16.80    | 29.02    | 4.43   | 19.61  | 0.10  | 0.10  | 0.10      | 0.10  | 1,253.00 | 5.24  |
| 9th June 2022      | RR | `10-20      | 6.25 | 15.50    | 36.21    | 1.01   | 18.27  | 0.10  | 0.10  | 0.10      | 0.10  | 921.09   | 6.25  |
| 9th June 2022      | RR | 20-30       | 6.05 | 11.02    | 11.66    | 0.94   | 17.97  | 0.10  | 0.10  | 0.10      | 0.10  | 854.00   | 3.25  |
| 9th June 2022      | RR | 30-40       | 5.45 | 5.01     | 4.21     | 1.24   | 17.73  | 0.10  | 0.10  | 0.10      | 0.10  | 297.00   | 2.99  |
| 9th June 2022      | SR | 40-50       | 6.80 | 100.36   | 77.02    | 38.00  | 131.96 | 16.84 | 4.94  | 1,200.02  | 4.56  | 49.51    | 5.25  |
| 9th June 2022      | SC | 50-60       | 8.54 | 1,425.00 | 134.23   | 93.80  | 36.25  | 68.90 | 36.80 | 1,924.68  | 25.10 | 450.96   | 2.54  |
| 9th June 2022      | RU | 60-70       | 7.45 | 339.00   | 226.00   | 3.37   | 42.25  | 1.05  | 0.01  | 526.88    | 0.93  | 2.36     | 3.58  |
| 9th June 2022      | RD | 70-80       | 7.30 | 340.00   | 226.00   | 4.52   | 42.00  | 4.06  | 1.41  | 693.00    | 2.60  | 4.26     | 3.21  |
| 9th June 2022      | DR | bulk sample | 7.75 | 36.60    | 27.00    | 3.25   | 11.24  | 2.90  | 1.65  | 331.63    | 3.35  | 52.00    | 10.20 |
| 9th September 2022 | RR | 0-10        | 6.68 | 15.30    | 20.00    | 10.02  | 5.36   | 23.05 | 4.00  | 66.61     | 2.54  | 1,120.00 | 2.68  |
| 9th September 2022 | RR | `10-20      | 6.80 | 9.23     | 5.50     | 12.98  | 3.52   | 63.02 | 10.47 | 58.39     | 6.94  | 994.21   | 3.67  |
| 9th September 2022 | RR | 20-30       | 6.01 | 7.44     | 4.40     | 0.63   | 3.04   | 15.05 | 3.86  | 49.69     | 3.04  | 970.76   | 3.51  |
| 9th September 2022 | RR | 30-40       | 5.58 | 4.36     | 3.25     | 1.00   | 3.27   | 2.01  | 4.01  | 44.79     | 3.04  | 901.21   | 3.42  |
| 9th September 2022 | SR | 40-50       | 6.69 | 84.00    | 45.03    | 23.88  | 115.02 | 18.25 | 10.55 | 1,244.02  | 4.25  | 107.03   | 5.24  |
| 9th September 2022 | SC | 50-60       | 7.74 | 1,254.00 | 920.00   | 36.22  | 29.23  | 69.90 | 32.50 | 2,965.00  | 12.06 | 813.02   | 25.85 |
| 9th September 2022 | RU | 60-70       | 7.12 | 330.00   | 220.00   | 16.01  | 39.20  | 2.09  | 3.88  | 463.73    | 3.60  | 1.26     | 3.92  |
| 9th September 2022 | RD | 70-80       | 6.80 | 330.00   | 221.00   | 18.30  | 39.80  | 4.23  | 6.73  | 550.00    | 5.38  | 4.23     | 3.25  |
| 9th September 2022 | DR | bulk sample | 5.98 | 39.50    | 32.00    | 12.03  | 15.02  | 2.02  | 4.03  | 23.90     | 2.56  | 60.88    | 9.02  |
